# Supplementary material
Source: HighWire-hosted journal article supplement (https://erj.ersjournals.com/content/61/5/2201720)
Supplement: inline-supplementary-material-2 [file inline-supplementary-material-2.pdf]

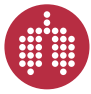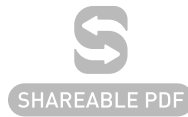

# Collaboration between explainable artificial intelligence and pulmonologists improves the accuracy of pulmonary function test interpretation

Nilakash Das<sup>1</sup>, Sofie Happaerts<sup>2</sup>, Iwein Gyselinck<sup>1,2</sup>, Michael Staes<sup>1,2</sup>, Eric Derom<sup>3</sup>, Guy Brusselle<sup>3</sup>, Felip Burgos<sup>4</sup>, Marco Contoli<sup>5</sup>, Anh Tuan Dinh-Xuan<sup>6</sup>, Frits M.E. Franssen<sup>7</sup>, Sherif Gonem<sup>8</sup>, Neil Greening<sup>9</sup>, Christel Haenebalcke<sup>10</sup>, William D-C. Man<sup>11,12</sup>, Jorge Moisés<sup>13</sup>, Rudi Peché<sup>14</sup>, Vitalii Poberezhets<sup>15</sup>, Jennifer K. Quint<sup>11,12</sup>, Michael C. Steiner<sup>9</sup>, Eef Vanderhelst<sup>16</sup>, Mustafa Abdo<sup>17</sup>, Marko Topalovic<sup>18</sup> and Wim Janssens<sup>1,2</sup>

<sup>1</sup>Laboratory of Respiratory Diseases and Thoracic Surgery, Department of Chronic Diseases Metabolism and Ageing, KU Leuven, Leuven, Belgium. <sup>2</sup>Clinical Department of Respiratory Diseases, University Hospitals Leuven, Leuven, Belgium. <sup>3</sup>UZ Gent, University of Ghent, Ghent, Belgium. <sup>4</sup>Department of Pulmonary Medicine, Hospital Clinic, Institut d'Investigacions Biomèdiques August Pi i Sunyer (IDIBAPS), University of Barcelona, Barcelona, Spain. <sup>5</sup>Department of Translational Medicine, University of Ferrara, Ferrara, Italy. <sup>6</sup>Service de Physiologie-Explorations Fonctionnelles, AP-HP, Hôpital Cochin, Université Paris Cité, Paris, France. <sup>7</sup>Department of Respiratory Medicine and School of Nutrition and Translational Research in Metabolism (NUTRIM), Maastricht University Medical Center, Maastricht, The Netherlands. <sup>8</sup>Nottingham University Hospitals NHS Trust, Nottingham, UK. <sup>9</sup>Leicester NIHR Biomedical Research Centre – Respiratory, Department of Respiratory Sciences, University of Leicester, Leicester, UK. <sup>10</sup>AZ Sint-Jan Brugge-Oostende, Bruges, Belgium. <sup>11</sup>National Heart and Lung Institute, Imperial College London, London, UK. <sup>12</sup>Royal Brompton and Harefield Clinical Group, Guy's and St Thomas' NHS Foundation Trust, London, UK. <sup>13</sup>Biomedical Research Networking Center on Respiratory Diseases (CIBERES), Madrid, Spain. <sup>14</sup>CHU Charleroi, Charleroi, Belgium. <sup>15</sup>Department of Propedeutics of Internal Medicine, National Pirogov Memorial Medical University, Vinnytsya, Ukraine. <sup>16</sup>University Hospital of Brussels, Vrije Universiteit Brussel, Brussels, Belgium. <sup>17</sup>LungenClinic Grosshansdorf, Grosshansdorf, Germany. <sup>18</sup>ArtiQ NV, Leuven, Belgium.

Corresponding author: Wim Janssens ([wim.janssens@uzleuven.be](mailto:wim.janssens@uzleuven.be))

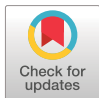

Shareable abstract (@ERSpublications)

This study demonstrates that pulmonologists improve their individual diagnostic interpretation of pulmonary function tests when supported by AI-based computer protocols with automated explanations. Such teamwork may become commonplace in the future. <https://bit.ly/3ZKK4Eu>

**Cite this article as:** Das N, Happaerts S, Gyselinck I, *et al.* Collaboration between explainable artificial intelligence and pulmonologists improves the accuracy of pulmonary function test interpretation. *Eur Respir J* 2023; 61: 2201720 [DOI: 10.1183/13993003.01720-2022].

This single-page version can be shared freely online.

Copyright ©The authors 2023.

This version is distributed under the terms of the Creative Commons Attribution Non-Commercial Licence 4.0. For commercial reproduction rights and permissions contact [permissions@ersnet.org](mailto:permissions@ersnet.org)

This article has an editorial commentary: <https://doi.org/10.1183/13993003.00625-2023>

Received: 13 Sept 2022  
Accepted: 9 March 2023

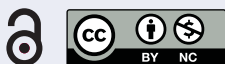

## Abstract

**Background** Few studies have investigated the collaborative potential between artificial intelligence (AI) and pulmonologists for diagnosing pulmonary disease. We hypothesised that the collaboration between a pulmonologist and AI with explanations (explainable AI (XAI)) is superior in diagnostic interpretation of pulmonary function tests (PFTs) than the pulmonologist without support.

**Methods** The study was conducted in two phases, a monocentre study (phase 1) and a multicentre intervention study (phase 2). Each phase utilised two different sets of 24 PFT reports of patients with a clinically validated gold standard diagnosis. Each PFT was interpreted without (control) and with XAI's suggestions (intervention). Pulmonologists provided a differential diagnosis consisting of a preferential diagnosis and optionally up to three additional diagnoses. The primary end-point compared accuracy of preferential and additional diagnoses between control and intervention. Secondary end-points were the number of diagnoses in differential diagnosis, diagnostic confidence and inter-rater agreement. We also analysed how XAI influenced pulmonologists' decisions.

**Results** In phase 1 (n=16 pulmonologists), mean preferential and differential diagnostic accuracy significantly increased by 10.4% and 9.4%, respectively, between control and intervention (p<0.001). Improvements were somewhat lower but highly significant (p<0.0001) in phase 2 (5.4% and 8.7%, respectively; n=62 pulmonologists). In both phases, the number of diagnoses in the differential diagnosis did not reduce, but diagnostic confidence and inter-rater agreement significantly increased during

intervention. Pulmonologists updated their decisions with XAI's feedback and consistently improved their baseline performance if AI provided correct predictions.

**Conclusion** A collaboration between a pulmonologist and XAI is better at interpreting PFTs than individual pulmonologists reading without XAI support or XAI alone.
